# Supplementary material for: Development and optimization of a high‐throughput screening assay for in vitro anti‐SARS‐CoV‐2 activity: Evaluation of 5676 Phase 1 Passed Structures
Source: PubMed Central journal article supplement — J Med Virol. 2022 Mar 23;94(7):3101–11. doi: 10.1002/jmv.27683 (PMC9088669; doi:10.1002/jmv.27683), 2022-03-23
Supplement: JMV-94-3101-s001.pdf [file JMV-94-3101-s001.pdf]

## **Supplementary Material**

### **Development and Optimization of a High-Throughput Screening Assay for In Vitro Anti SARS-CoV-2 Activity: Evaluation of 5676 Phase One Passed Structures**

Winston Chiu, Lore Verschueren, Christel Van den Eynde, Christophe Buyck, Sandra De Meyer, Dirk Jochmans, Denisa Bojkova, Sandra Ciesek, Jindrich Cinatl, Steven De Jonghe, Pieter Leyssen, Johan Neyts, Marnix Van Loock, Ellen Van Damme

| Identifier      | Name                           | GFP plate reader anti-viral screen EC50 (µM) | HCl antiviral screen EC50 (µM) | ATPlite toxicity CC50 (µM) |
|-----------------|--------------------------------|----------------------------------------------|--------------------------------|----------------------------|
| COVC-0134286843 | EVP-6124_ENCENICLINE           | >100.00                                      | >100.00                        | 20.9                       |
| COVC-0135464447 | VE-822                         | > 5.01                                       | 8.32                           | 10.2                       |
| COVC-0135517367 | ORANTINIB STEREOISOMER         | 2                                            | > 50.10                        | > 50.10                    |
| COVC-0136083474 | HALOFANTRINE                   | > 20.00                                      | 9.12                           | 15.1                       |
| COVC-0136118120 | PECAZINE                       | > 20.00                                      | >100.00                        | 11.8                       |
| COVC-0136318398 | CANNABINOR                     | >100.00                                      | > 50.10                        | 7.67                       |
| COVC-0136544954 | CYCLOSPORINE                   | >100.00                                      | >100.00                        | 18.6                       |
| COVC-0136580428 | ALMOREXANT                     | 18.6                                         | > 25.10                        | 21.4                       |
| COVC-0136643402 | BEDAQUILINE                    | > 50.10                                      | > 50.10                        | 13.7                       |
| COVC-0138110417 | RAVIDASVIR                     | >100.00                                      | >100.00                        | 12.7                       |
| COVC-0139007958 | ICI-195739                     | >100.00                                      | >100.00                        | 25.7                       |
| COVC-0139169083 | JNJ-18038683                   | > 25.10;> 20.00                              | > 25.10                        | 14.6                       |
| COVC-0139464749 | BP-897                         | > 25.10                                      | > 25.10                        | 30.2                       |
| COVC-0139663433 | 8-AZAGUANINE                   | > 50.10                                      | > 50.10                        | 23.7                       |
| COVC-0140030971 | PIPENDOXIFENE                  | 3.63                                         | > 6.31                         | 4.62                       |
| COVC-0140330787 | TMC310911                      | 6.92; 2.24                                   | 9.55;>100.00                   | 14.30; 11.80               |
| COVC-0140549998 | SALMATEROL                     | 19.1                                         | >100.00                        | 18.6                       |
| COVC-0140833037 | TIOPIRIDONE                    | 9.12                                         | >100.00                        | 7.24                       |
| COVC-0140864590 | TRIMEPRAZINE                   | 17.4                                         | > 25.10                        | 21.4                       |
| COVC-0140958357 | TIPIFARNIB                     | >100.00                                      | >100.00                        | 13.3                       |
| COVC-0141087222 | CLOMIPRAMINE                   | 14.5                                         | >100.00                        | 16                         |
| COVC-0141101284 | MCN-5691                       | 4.27                                         | >100.00                        | 4.84                       |
| COVC-0141142856 | MEQUITAZINE                    | 7.76                                         | >100.00                        | 7.76                       |
| COVC-0141155358 | FLUSPIRILENE                   | >100.00                                      | >100.00                        | 7                          |
| COVC-0141155434 | PHENOXYBENZAMINE HYDROCHLORIDE | 20                                           | >100.00                        |                            |
| COVC-0141206740 | LESOPITRON                     | 2.34                                         | >100.00                        | >100.00                    |
| COVC-0141212165 | NORTRIPTYLIN                   | 15.9                                         | >100.00                        | 24                         |
| COVC-0141261705 | EVANS-BLUE                     | >100.00                                      | >100.00                        | 18                         |
| COVC-0149442021 | MOCRAVIMOD                     | 3.31                                         | >100.00                        | 3.06                       |
| COVC-0149674334 | BREXPIRAZOLE                   | >100.00                                      | >100.00                        | 12                         |
| COVC-0150976668 |                                |                                              | > 20.00                        |                            |
| COVC-0150980605 | ENECADIN                       | 1.74                                         | 21.9                           |                            |
| COVC-0672397984 | EVP-0334                       | >100.00                                      | >100.00                        | 1.55                       |
| COVC-0672954843 | DULOXETINE                     | >100.00; 7.24                                | >100.00;> 10.00                | 17.80; 14.80               |
| COVC-0674506360 | CAMOSTAT                       | > 20.00                                      | >100.00                        |                            |
| COVC-0675007677 | DACLATASVIR                    | >100.00                                      | >100.00                        | 19.7                       |
| COVC-0675868528 | METITEPINE                     | 7.24                                         | >100.00                        | 7                          |
| COVC-0675878035 | SABELUZOLE                     | 18.6                                         | >100.00                        | 15.3                       |
| COVC-0675923228 | FLUPENTHIXOL                   | 8.71                                         | >100.00                        | 7.67                       |
| COVC-0676534350 | BAY-B-5369                     |                                              | > 20.00                        |                            |
| COVC-0677008167 | AZELASTINE                     | 13.3                                         | >100.00                        | 17.8                       |
| COVC-0677194034 | REVAPRAZAN                     | >100.00                                      | 10.5                           | 11.5                       |
| COVC-0677582639 | SAREDUTANT (MIXTURE?)          | >100.00                                      | >100.00                        | 23.4                       |
| COVC-0677720184 | EUPROGIN                       | >100.00                                      | >100.00                        | 11.4                       |
| COVC-0677735491 | THIOPROPERAZINE                | 13.2                                         | >100.00                        | 6.31                       |
| COVC-0677952181 | BIFEMELANE                     | >100.00                                      | 20.9                           | 26.9                       |
| COVC-067795252  | METHADONE                      | > 25.10                                      | > 25.10                        | 13.2                       |
| COVC-0677970346 | LACIDIPINE                     | > 10.00                                      |                                | 7.24                       |
| COVC-0677970490 | TIOSPIRONE                     | >100.00                                      | >100.00                        | 24.6                       |
| COVC-0678000383 | CURCUMIN                       | >100.00                                      | >100.00                        | 14.8                       |
| COVC-0678006086 | ABIRATERONE ACETATE            | >100.00                                      | > 25.10                        | 9.89                       |
| COVC-0678009973 | SEMATILIDE                     | 3.89                                         | >100.00                        | >100.00                    |
| COVC-0678023366 | CLOCINIZINE                    | >100.00                                      | 20.9                           | 21.9                       |
| COVC-0678033956 | PROMETHAZINE                   | 21.9                                         | >100.00                        | 33.1                       |
| COVC-0678071379 | PIPTHIAZINE                    | 13.8                                         | >100.00                        | 7.33                       |
| COVC-0678151537 | METHDILAZINE                   | 16.2                                         | >100.00                        | 14.8                       |
| COVC-0678170981 | INDATRALINE                    | 8.32                                         | >100.00                        | 8.51                       |
| COVC-0678171662 | THIOTHIXENE                    | >100.00                                      | 5.75                           | 4.96                       |
| COVC-0678230812 | DRAFLAZINE                     | >100.00                                      | >100.00                        | 9.66                       |
| COVC-0678388189 | HALETAZOLE                     | 3.89                                         | >100.00;> 10.00                | 3.72                       |
| COVC-0678849574 | SEPROXETINE                    | 7.59                                         | >100.00                        | 10.6                       |

| Identifier      | Name                               | GFP plate reader anti-viral screen EC50 (μM) | HCl antiviral screen EC50 (μM) | ATPlite toxicity CC50 (μM) |
|-----------------|------------------------------------|----------------------------------------------|--------------------------------|----------------------------|
| COVC-0678867755 | BENIDIPINE                         | >100.00                                      | >100.00                        | 14.8                       |
| COVC-0678879901 | ITRACONAZOLE                       | >100.00                                      |                                | >100.00                    |
| COVC-0686249369 | TAK-652                            |                                              | > 20.00                        |                            |
| COVC-0687833464 |                                    |                                              | > 20.00                        |                            |
| COVC-0687841008 |                                    |                                              | > 20.00                        |                            |
| COVC-0687843163 |                                    |                                              | > 20.00                        |                            |
| COVC-0687847569 |                                    |                                              | > 20.00                        |                            |
| COVC-0687852474 | BGP-15                             | 0.525                                        | >100.00                        |                            |
| COVC-0687853800 | EIDD-2801                          | 14.1                                         | 4.43                           |                            |
| COVC-0687854362 | ANAMORELIN HYDROCHLORIDE           |                                              | > 20.00                        |                            |
| COVC-1207972476 | DR1289116                          | >100.00                                      | > 50.10                        | 16                         |
| COVC-1207984410 | ANDROGRAPHOLIDE                    | >100.00                                      | >100.00                        | 21.6                       |
| COVC-1208049825 | GS-938                             | > 20.00                                      | > 50.10                        |                            |
| COVC-1210360354 | METHOTRIMEPRAZINE_LEVOMEPRIMAZINE  | 11.8                                         | > 50.10                        | 11.6                       |
| COVC-1210360383 | MONENSIN                           | > 20.00                                      | 1.12                           |                            |
| COVC-1210363295 | PRENYLAMINE                        | 8.71                                         | >100.00                        | 8.41                       |
| COVC-1210363846 | SULCOTIDIL                         | >100.00                                      | >100.00                        | 3.27                       |
| COVC-1211756174 | DARIFENACIN                        | > 25.10                                      | >100.00                        | 56.2                       |
| COVC-1212730902 | NEBIVOLOL                          | 8.91                                         | >100.00                        | 7                          |
| COVC-1212741697 | R-167154 ISOMER                    | >100.00                                      | >100.00                        | 19.5                       |
| COVC-1212748902 | NEBIVOLOL                          | > 10.00                                      | >100.00                        | 8.71                       |
| COVC-1213406057 | PIPERLONGUMINE                     | > 50.10                                      | > 50.10                        | 9.55                       |
| COVC-1214272359 | CLEMASTINE                         | > 50.10                                      | 20.4                           | 18.4                       |
| COVC-1214358711 | BROFAROMINE                        | 14.8                                         | >100.00                        | 19.1                       |
| COVC-1214407107 | QUININE_QUINIDINE                  | 15.1                                         | > 25.10                        | > 25.10                    |
| COVC-1214563522 | BITOLTEROL                         | 8.13                                         | >100.00                        | 5.69                       |
| COVC-1214565530 | METIXENE                           | 9.55                                         | >100.00                        | 10.1                       |
| COVC-1214607586 | PROPIPOCAINE                       | >100.00                                      | >100.00                        | 31.6                       |
| COVC-1214614542 | CARFENAZINE                        | >100.00                                      | >100.00                        | 6.31                       |
| COVC-1214621709 | FENOBAM                            | > 20.00                                      | > 25.10                        |                            |
| COVC-1214767323 | ZOTEPINE                           | >100.00                                      | >100.00                        | 12.3                       |
| COVC-1214826443 | GIRISOPAM                          | >100.00                                      | >100.00                        | >100.00                    |
| COVC-1214829248 | HALOFANTRINE                       | 9.55                                         | 9.12                           | 11.5                       |
| COVC-1214857454 | FLUPHENAZINE                       | >100.00                                      | >100.00                        | 7.76                       |
| COVC-1214857892 | OXATOMIDE                          | >100.00                                      | >100.00                        | 12.6                       |
| COVC-1214895840 | SPIPERONE                          | 20.4                                         | 22.4                           | 81.3                       |
| COVC-1214897179 | PENFLURIDOL                        | >100.00                                      | >100.00                        | 3.59                       |
| COVC-1214903948 | INDOMETACIN                        | >100.00                                      | >100.00; > 50.10               | >100.00                    |
| COVC-1215023048 | METHYPRYLON                        | 18.4                                         | > 25.10                        | > 25.10                    |
| COVC-1215027317 | LEVOMEPRIMAZINE                    | >100.00                                      | >100.00                        | 22.9                       |
| COVC-1215738110 | CLOMIFENE                          | > 20.00                                      | > 20.00                        |                            |
| COVC-1222873116 | HYDROXYCHLOROQUINE STEREOISOMER(S) | 12.7                                         | 18.8                           | > 50.10                    |
| COVC-1223085504 | CCS-1477 (S*)                      | >100.00                                      | >100.00                        | 3.16                       |
| COVC-1224702964 |                                    |                                              | >100.00                        |                            |
| COVC-1746032955 | REMDESIVIR                         | 4.64                                         | 3.12                           | 95.5                       |
| COVC-1746696265 | ATRACURIUM BESYLATE                |                                              | > 20.00                        |                            |
| COVC-1746967931 | TOREFORANT                         | > 25.10                                      | > 50.10                        | 22.4                       |
| COVC-1747138106 | BERBAMINE                          | 8.51                                         | > 6.31                         | 10.2                       |
| COVC-1747138440 | SALINOMYCIN                        | > 20.00                                      | 1.29                           |                            |
| COVC-1747138479 | BEBEERINE                          | > 10.00                                      | 5.37                           | 11.5                       |
| COVC-1747162848 | CASOPITANT                         | > 25.10                                      | > 25.10                        | 17.8                       |
| COVC-1747188285 | BI-2536                            | > 50.10                                      | > 50.10                        | 0.603                      |
| COVC-1747231597 | DEPTROPINE                         | 7.41                                         | > 50.10                        | 13.5                       |
| COVC-1747292777 | LYNESTRENOL                        | > 50.10                                      | > 50.10                        | 10.5                       |
| COVC-1747397988 | HT-61                              | > 20.00                                      | 4.9                            |                            |
| COVC-1748269057 | NERATINIB                          |                                              | > 10.00                        |                            |
| COVC-1751145778 | DITHRANOL                          | >100.00                                      | >100.00                        | >100.00                    |
| COVC-1751409823 | SYROSINGOPINE                      | >100.00                                      | >100.00                        | 8.91                       |
| COVC-1751415324 | OXAPROZIN                          | 11.8                                         | > 50.10                        | > 50.10                    |
| COVC-1751439919 | PERAZINE                           | 14                                           | >100.00                        | 14.6                       |
| COVC-1751458750 | NOXIPTILINE                        | 14.1                                         | >100.00                        | 77.6                       |

| Identifier      | Name                        | GFP plate reader anti-viral screen EC50 (µM) | HCl antiviral screen EC50 (µM) | ATPlite toxicity CC50 (µM) |
|-----------------|-----------------------------|----------------------------------------------|--------------------------------|----------------------------|
| COVC-1751645509 | CARPIPRAMINE                | 8.91                                         | >100.00                        | 8.61                       |
| COVC-1751700625 | CLOPIPAZAN                  | > 20.00                                      | >100.00                        | 15                         |
| COVC-1751748815 | METHOXYTACRINE              | 11.5                                         | > 25.10                        | 47.9                       |
| COVC-1751763386 | PROADIFEN                   | 5.13                                         | >100.00                        | 24                         |
| COVC-1751764998 | ASTEMIZOLE                  | >100.00                                      | >100.00                        | 7.5                        |
| COVC-1751771027 | PROFLAVINE                  | 15                                           | > 25.10                        | 6.61                       |
| COVC-1751892074 | BBR-3464                    |                                              | > 20.00                        |                            |
| COVC-1751893009 | DIPERODON                   | 15.1                                         | > 25.10                        | > 25.10                    |
| COVC-1752607069 | SAPERCONAZOLE               | >100.00;> 20.00                              | >100.00                        | >100.00                    |
| COVC-1752620251 | 3 ALLYL FENTANYL            | 4.37                                         | 4.9                            |                            |
| COVC-1760096432 | GSK-921                     | > 50.10                                      | > 50.10                        | 2.63                       |
| COVC-1760099291 | AJULEMIC ACID               | >100.00                                      | >100.00                        | 21.4                       |
| COVC-1760287043 | SULFATINIB                  | > 10.00                                      | > 50.10                        | 4.9                        |
| COVC-1761575739 |                             |                                              | > 20.00                        |                            |
| COVC-1761588262 |                             |                                              | > 20.00                        |                            |
| COVC-1761590281 |                             |                                              | > 20.00                        |                            |
| COVC-1761595595 | V-GLYCOPEPTIDE              |                                              | > 20.00                        |                            |
| COVC-1761604319 | ADOMEGLIVANT                | > 10.00                                      | > 6.31                         | 10.4                       |
| COVC-2282947189 | VALRUBICIN                  |                                              | > 20.00                        |                            |
| COVC-2283008312 | NAVITOCCLAX                 | >100.00                                      | >100.00                        | 4.73                       |
| COVC-2283590314 | OSIMERTINIB                 | >100.00                                      | >100.00                        | 3.09                       |
| COVC-2283593123 | GSK1070916                  | >100.00                                      | >100.00                        | 9.33                       |
| COVC-2285168592 | VINORELBINE                 |                                              | > 20.00                        |                            |
| COVC-2285169276 | C-172                       | 19.5                                         | 14.5                           | 28.2                       |
| COVC-2286471467 | LOFENTANIL                  | 20.9                                         | > 25.10                        |                            |
| COVC-2286484880 | METHYLDOPA                  | 17.8                                         | >100.00                        |                            |
| COVC-2286491085 | NEBIVOLOL                   | >100.00                                      | >100.00                        | 10.2                       |
| COVC-2286528427 | CDP-840 (B)                 | >100.00                                      | >100.00                        | 23.4                       |
| COVC-2286535978 | PENBUTOLOL                  | 15.1                                         | 20                             | 29.5                       |
| COVC-2287142567 | NORCYCLOBENZAPRINE          | > 50.10                                      | > 50.10                        | 23.4                       |
| COVC-2287147580 | CEFOPERAZONE                | > 20.00                                      | > 20.00                        |                            |
| COVC-2287807964 | SAQUINAVIR                  | >100.00                                      | >100.00                        | 18.2                       |
| COVC-2288269965 | PIPERACETAZINE              | 16.2                                         | > 12.60                        | 12.2                       |
| COVC-2288318596 | METHOPROMAZINE              | > 20.00                                      | >100.00                        | 14.1                       |
| COVC-2288327793 | DIAMOCAINE                  | 9.55                                         | 22.4                           | 46.8                       |
| COVC-2288339516 | OXETORONE                   | 18.2                                         | >100.00                        | 12.2                       |
| COVC-2288570388 | DOSULEPIN                   | 16.6                                         | > 25.10                        | 20                         |
| COVC-2288571827 | BUCINDOLOL                  | 17                                           | >100.00                        | 30.9                       |
| COVC-2288600616 | DRONEDARONE                 | 3.02                                         | >100.00                        | 3.85                       |
| COVC-2288609209 | LOPERAMIDE                  | 11.8                                         | 8.91                           | 22                         |
| COVC-2288621041 | PRENYLAMINE                 | 8.51                                         | >100.00                        | 10.7                       |
| COVC-2288636389 | ZIMELIDINE                  | > 20.00                                      |                                | > 10.00                    |
| COVC-2288688211 | MILENPERONE                 | >100.00                                      | >100.00                        | 32.4                       |
| COVC-2288695035 | CARVEDILOL                  | 15.5                                         | 10                             | 17                         |
| COVC-2288727795 | NAFOXIDINE                  | >100.00                                      | >100.00                        | 3.85                       |
| COVC-2288809083 | RHODOQUINE                  | 24.6                                         | >100.00                        | >100.00                    |
| COVC-2288955269 | LIFIBRATE                   | >100.00                                      | >100.00                        | 38                         |
| COVC-2289454566 | BEDAQUILINE                 | >100.00                                      | 15.5                           | 26.9                       |
| COVC-2289479927 | ZUCLOPENTHIXOL_CLOPENTHIXOL | 7.24                                         | >100.00                        | 6.68                       |
| COVC-2289732646 | PIMETHIXENE                 | >100.00                                      | >100.00                        | 25.7                       |
| COVC-2298439635 |                             |                                              | > 20.00;> 20.00                |                            |
| COVC-2298460306 |                             |                                              | > 20.00                        |                            |
| COVC-2298477237 | O-304                       |                                              | > 20.00                        |                            |
| COVC-2819871799 | IVACAFTOR                   | 4.57                                         | > 25.10                        | 4.62                       |
| COVC-2820438510 | LOTEPREDNOL ETABONATE       |                                              | > 20.00                        |                            |
| COVC-2820464103 | VOLASERTIB                  | > 50.10                                      | > 50.10                        | 0.234                      |
| COVC-2820786116 | TETRANDRINE_HANFANGCHIN A   | 3.98                                         | > 50.10                        | 5.17                       |
| COVC-2820802843 | CRIZOTINIB                  | 6.76                                         | 4.47                           | 4.42                       |
| COVC-2821037923 | FLUORESC EIN                |                                              | >0.3090                        | > 20.00                    |
| COVC-2821711673 | HYDROQUINIDINE              | 15.5                                         | > 25.10                        | > 25.10                    |
| COVC-2822096521 | RENYTOLINE                  | 3.47                                         | >100.00                        | 2.92                       |

| Identifier      | Name                    | GFP plate reader anti-viral screen EC50 (µM) | HCl antiviral screen EC50 (µM) | ATPlite toxicity CC50 (µM) |
|-----------------|-------------------------|----------------------------------------------|--------------------------------|----------------------------|
| COVC-2823343639 | NEBIVOLOL               | >100.00                                      | >100.00                        | 7.85                       |
| COVC-2823361537 | NEBIVOLOL               | >100.00                                      | >100.00                        | 7.76                       |
| COVC-2824600869 | ARIPIRAZOLE             | >100.00                                      | >100.00                        | 11.4                       |
| COVC-2825210622 | BUCLIZINE               | >100.00                                      | 20.4                           | 81.3                       |
| COVC-2825221500 | SERCLOREMINE            | 17.2                                         | >100.00                        | 34.7                       |
| COVC-2825327487 | PAROXETINE              | 15.1                                         | >100.00                        | 16.6                       |
| COVC-2825450452 | CLOSIPIRAMINE           | 7.41                                         | >100.00                        | 8.13                       |
| COVC-2825472328 | LIDOFLAZINE             | 9.55                                         | >100.00                        | 8.41                       |
| COVC-2825487070 | ARBIDOL                 | >100.00                                      | >100.00                        |                            |
| COVC-2825507141 | ACEPROMAZINE            | >100.00                                      | >100.00                        | 22.4                       |
| COVC-2825508294 | MASOPROCOL              | >100.00                                      | >100.00                        | 37.2                       |
| COVC-2825514435 | CHLOROQUINE             | 5.86                                         | 9.46                           | 38.7                       |
| COVC-2825515130 | QUINESTROL              | 8.71                                         | >100.00                        | 7.59                       |
| COVC-2825616197 | CLOBENZTROPINE          | 9.77                                         | >100.00                        | 8.13                       |
| COVC-2825616302 | DIHYDREXIDINE           | 7.94                                         | >100.00                        | 18.6                       |
| COVC-2825622218 | OXETHAZAINE             | 18.6                                         | >100.00                        | 26.3                       |
| COVC-2825640648 | HOMOCHLORCYCLIZINE      | > 20.00                                      | > 25.10                        | 21.1                       |
| COVC-2825645391 | TERFENADINE             | >100.00                                      | >100.00                        | 5.13                       |
| COVC-2826330726 | ZAMIFENACIN             | >100.00                                      | 87.1                           | >100.00                    |
| COVC-2826351877 | SABELUZOLE              | >100.00                                      | >100.00                        | 15.5                       |
| COVC-2833485378 | HYDROXYCHLOROQUINE (R*) | 12.7                                         | > 50.10                        | > 50.10                    |
| COVC-2833739552 | QCC-374                 | 17.4                                         | 16.6                           | 50.1                       |
| COVC-2835343357 | LEVOMEFOLATE            |                                              | > 20.00                        |                            |
| COVC-3356547646 | HDAC-42_AR-42           | > 20.00                                      |                                | 0.851                      |
| COVC-3356682871 | TEPOTINIB_EMD-1214063   | >100.00                                      | >100.00                        | 5.75                       |
| COVC-3356809212 | CYTARABINE              | > 50.10                                      | > 20.00                        |                            |
| COVC-3357305447 | TPEN                    | > 3.09                                       | >100.00                        | 1.93                       |
| COVC-3357309398 | CEFUROXIME AXETIL       |                                              | > 20.00                        |                            |
| COVC-3357775383 | SUDOTERB                | >100.00                                      | >100.00                        | 14.3                       |
| COVC-3357844334 | TRIBENOSIDE             | > 50.10                                      | > 50.10                        | 17.4                       |
| COVC-3358854404 | PONATINIB_ICLUSIG       | > 20.00;>100.00                              | >100.00                        | 0.9890;< 1.55              |
| COVC-3359139833 | ERDAFITINIB             | > 10.00;>100.00                              | > 6.31                         | 5.25; 3.63                 |
| COVC-3359217199 | MK-0893                 | >100.00                                      | >100.00                        | 18.8                       |
| COVC-3360221789 | EPIRUBICIN              |                                              | >100.00                        |                            |
| COVC-3360223611 | CINNARIZINE             | 18.2                                         | >100.00                        | 14.5                       |
| COVC-3360248091 | DOXORUBICIN             | 8.04                                         | 33.1                           | 64.6                       |
| COVC-3360252970 | ALVOCIDIB               |                                              | > 10.00                        |                            |
| COVC-3360889795 | CONESSINE               | 12                                           | > 25.10                        | 34.7                       |
| COVC-3361592863 | TMC-353121              | > 20.00                                      | > 20.00;> 5.01                 | 9.33                       |
| COVC-3361708049 | AMG-487-(+/-)           | > 20.00                                      | > 20.00                        |                            |
| COVC-3361719627 | TANDUTINIB              | >100.00                                      | >100.00                        | 11.5                       |
| COVC-3362013046 | PERICIAZINE             | > 20.00                                      | >100.00                        | 12.7                       |
| COVC-3362049948 | METOFENAZATE            | 18.6                                         | >100.00                        | >100.00                    |
| COVC-3362050611 | ACETOPHENAZINE          | >100.00                                      | >100.00                        | 14.6                       |
| COVC-3362302644 | FLUPIRTINE              | >100.00                                      | >100.00                        | >100.00                    |
| COVC-3362312915 | PROTRIPTYLINE           | >100.00                                      | >100.00                        | 26.3                       |
| COVC-3362312957 | THIORIDAZINE            | 6.76                                         | >100.00                        | 6.38                       |
| COVC-3362314340 | BENZATROPINE            | > 25.10                                      | >100.00                        | 46.8                       |
| COVC-3362314676 | RAUNORMINE_DESERPIDINE  | > 20.00                                      | > 25.10                        | 11.5                       |
| COVC-3362317361 | QUINESTROL              | >100.00                                      | >100.00                        | 8.22                       |
| COVC-3362343100 | TERFLAVOXATE            | >100.00                                      | >100.00                        | 63.1                       |
| COVC-3362347376 | TRIFLUOPERAZINE         | 6.46                                         | >100.00                        | 7.94                       |
| COVC-3362350497 | CHLORBENZOXAMINE        | >100.00                                      | > 25.10                        | 15.3                       |
| COVC-3362350605 | LASALOCID               | >0.6310                                      | 1.07                           | 5.37                       |
| COVC-3362375297 | NORGESTIMATE            | >100.00                                      | >100.00                        | 20.9                       |
| COVC-3362380349 | CINCHOCAINE             | 29.1                                         | 29.5                           | 39.6                       |
| COVC-3362381936 | PROMAZINE               | 16.2                                         | >100.00                        | 25.7                       |
| COVC-3362486392 | DOTARIZINE              | > 20.00                                      | 10                             | 17.4                       |
| COVC-3363187991 | COLCHICINE              | >100.00                                      | >100.00                        |                            |
| COVC-3370896893 | R-428_BEMCENTINIB       | 1.78                                         | > 50.10                        | 1.55                       |
| COVC-3372196066 | ROVAZOLAC               |                                              | > 20.00                        |                            |

| Identifier      | Name                   | GFP plate reader anti-viral screen EC50 (µM) | HCl antiviral screen EC50 (µM) | ATPlite toxicity CC50 (µM) |
|-----------------|------------------------|----------------------------------------------|--------------------------------|----------------------------|
| COVC-3372202143 |                        |                                              | > 20.00                        |                            |
| COVC-3372208332 | L-1777                 |                                              | > 20.00                        |                            |
| COVC-3372208930 | MAVORIXAFOR            |                                              | > 20.00                        |                            |
| COVC-3893557264 | BMS833923              | 2.95                                         | >100.00                        | 3.09                       |
| COVC-3893559927 | RIBOCICLIB             | >100.00                                      | >100.00                        | 38.9                       |
| COVC-3894275940 | TECALCET               | 16.6                                         | >100.00                        | 28.2                       |
| COVC-3894718404 | DOSULEPIN              | 14.3                                         | > 25.10                        | 17                         |
| COVC-3894856214 | GIVINOSTAT             | 10.5                                         | >100.00                        | 0.767                      |
| COVC-3895781309 | ALOXISTATIN            | 34.3                                         | 85.1                           | >100.00                    |
| COVC-3897093565 | NEBIVOLOL              | >100.00                                      | >100.00                        | 7.16                       |
| COVC-3897104103 | SABELUZOLE             | 18.6                                         | >100.00                        | 19.5                       |
| COVC-3897760602 | VITAMINE B2_RIBOFLAVIN | 11.2                                         | > 50.10                        | > 50.10                    |
| COVC-3898089676 | DARUNAVIR              | > 20.00                                      | > 20.00                        |                            |
| COVC-3898253804 | LOPINAVIR              | 22.9                                         | 15.7                           | 33.7                       |
| COVC-3898420702 | NELFINAVIR             | 5.22                                         | 3.50; 4.10                     | 11.2                       |
| COVC-3898606637 | JNJ-5207852            | > 20.00                                      | > 20.00                        |                            |
| COVC-3898674512 | IMATINIB_GLEEVEC_      | 11                                           | 21.9                           | 11.9                       |
| COVC-3898855212 | CHLORPROTHIXENE        | 7.08                                         | >100.00                        | 13.8                       |
| COVC-3898932127 | BUTOPROZINE            | >100.00                                      | >100.00                        | 6.61                       |
| COVC-3898935732 | OXAPROTILINE           | >100.00                                      | >100.00                        | 28.2                       |
| COVC-3898956268 | CLOXACEPRIDE           | 3.63                                         | >100.00                        | 2.85                       |
| COVC-3899173551 | FLUTROLINE             | 4.68                                         | >100.00                        | 6.92                       |
| COVC-3899185596 | RESCINNAMINE           | > 50.10                                      | >100.00                        | 5.5                        |
| COVC-3899220261 | FENRETINIDE            | >100.00                                      | 2.95                           | 5.01                       |
| COVC-3899221661 | RESERPINE              | > 25.10                                      | > 50.10                        | 11                         |
| COVC-3899227081 | ALGESTONE ACETOPHENIDE | >100.00                                      | > 12.60                        | 15.5                       |
| COVC-3899229498 | RG-12915               | 7.94                                         | > 25.10                        | 21.6                       |
| COVC-3899304998 | FEZOLAMINE             | 14.5                                         | >100.00                        | 39.8                       |
| COVC-3899357267 | DILAZEP                | >100.00                                      | >100.00                        | 28.2                       |
| COVC-3899382603 | HYDROXYCHLOROQUINE     | 11.6                                         | > 10.00; 18.00                 | 47.9                       |
| COVC-3899396989 | CYCLOSPORINE           | 6.61                                         | > 50.10                        | 26.3                       |
| COVC-3899449667 | SEGANSERIN             | 7.59                                         | >100.00                        | 10.2                       |
| COVC-3900064416 | ASENAPINE              | > 25.10                                      | >100.00                        | 5.89                       |
| COVC-3900085863 | POSACONAZOLE           | >100.00                                      | >100.00                        | >100.00                    |
| COVC-3900086865 | FLUOTRACEN             | >100.00                                      | 10.5                           | 12                         |
| COVC-3900092763 | NABILONE               | 8.91                                         | > 25.10                        | 11.1                       |
| COVC-3900101626 | TERCONAZOLE            | 16.6                                         | > 12.60                        | 10                         |
| COVC-3900102081 | RITONAVIR              | > 50.10                                      |                                | 37.2                       |
| COVC-3900128072 | R-167154               | >100.00                                      | > 50.10                        | 22.4                       |
| COVC-3900346251 | ORANTINIB              | 1.78                                         | > 25.10                        | > 25.10                    |
| COVC-3907440078 | CCS-1477 (R*)          | >100.00                                      | >100.00                        | 9.12                       |
| COVC-3907758471 | ANLOTINIB              | >100.00                                      | >100.00                        | 5.25                       |
| COVC-3909057522 |                        |                                              | > 20.00                        |                            |
| COVC-3909068638 |                        |                                              | > 20.00                        |                            |
